# Supplementary material for: Metabolomics Study Suggests the Mechanism of Different Types of Tieguanyin (Oolong) Tea in Alleviating Alzheimer’s Disease in APP/PS1 Transgenic Mice
Source: MDPI journal article supplement (doi:10.3390/metabo12050466), 2022-05-22

**Table S1.** The main chemical components of Tieguanyin tea extracts.

| Components          | Percentage (%) |       |       |
|---------------------|----------------|-------|-------|
|                     | Tgy-C          | Tgy-Q | Tgy-N |
| tea polyphenols     | 36.82          | 43.72 | 39.64 |
| free amino acids    | 4.79           | 6.41  | 6.26  |
| soluble protein     | 10.47          | 8.86  | 9.21  |
| soluble sugar       | 27.81          | 36.20 | 33.65 |
| tea polysaccharides | 5.74           | 4.86  | 3.73  |
| flavone             | 3.21           | 2.41  | 2.65  |
| caffeine            | 7.49           | 7.13  | 7.12  |

**Table S2.** Different metabolites between Tgy-C and MC groups in the pathway of biosynthesis of amino acids.

| Description     | VIP | Fold Change | P-value |
|-----------------|-----|-------------|---------|
| L-Threonine     | 1.1 | 0.55        | 5.9E-06 |
| L-Leucine       | 4.4 | 0.56        | 5.3E-04 |
| L-Methionine    | 2.8 | 0.46        | 1.4E-03 |
| L-Phenylalanine | 5.5 | 0.56        | 1.9E-03 |
| L-Tryptophan    | 1.7 | 0.57        | 5.0E-02 |
| L-Citrulline    | 2.3 | 0.69        | 7.4E-02 |
| L-Tyrosine      | 2.3 | 1.38        | 9.9E-02 |
| L-Alanine       | 2.5 | 0.48        | 1.5E-03 |
| L-Lysine        | 2.6 | 0.28        | 9.6E-03 |
| L-Glutamate     | 3.1 | 0.55        | 2.3E-02 |

**Table S3.** Different metabolites between Tgy-C and MC groups in the pathway of ABC transporters.

| Description            | VIP | Fold Change | P-value |
|------------------------|-----|-------------|---------|
| L-Threonine            | 1.1 | 0.55        | 5.9E-06 |
| L-Leucine              | 4.4 | 0.56        | 5.3E-04 |
| L-Phenylalanine        | 5.5 | 0.56        | 1.9E-03 |
| Riboflavin             | 1.3 | 0.48        | 8.3E-03 |
| Thiamine               | 13  | 0.57        | 2.0E-02 |
| N-Acetyl-D-glucosamine | 1.5 | 0.74        | 3.5E-02 |
| Deoxycytidine          | 1.7 | 1.58        | 4.2E-02 |
| Taurine                | 1.0 | 0.30        | 6.2E-02 |
| L-Alanine              | 2.5 | 0.48        | 1.5E-03 |
| L-Lysine               | 2.6 | 0.28        | 9.6E-03 |
| 2'-Deoxyuridine        | 5.9 | 0.38        | 1.6E-02 |
| L-Glutamate            | 3.1 | 0.55        | 2.3E-02 |
| Deoxyinosine           | 5.7 | 0.41        | 3.5E-02 |

**Table S4.** Different metabolites between Tgy-N and MC groups in the pathway of biosynthesis of amino acids.

| Metabolites     | VIP | Tgy-N vs MC |         | Tgy-N vs Tgy-C |
|-----------------|-----|-------------|---------|----------------|
|                 |     | Fold Change | P-value | Fold Change    |
| L-Threonine     | 1.2 | 0.50        | 3.5E-04 | 0.92           |
| L-Phenylalanine | 6.7 | 0.49        | 2.4E-03 | 0.89           |
| L-Methionine    | 2.8 | 0.45        | 3.0E-03 | 1.00           |
| L-Leucine       | 4.3 | 0.59        | 3.2E-03 | 0.95           |
| L-Tyrosine      | 3.1 | 0.55        | 2.0E-02 | 0.88           |
| L-Glutamate     | 2.1 | 0.55        | 3.1E-02 | 0.95           |
| L-Citrulline    | 2.4 | 0.65        | 3.1E-02 | 0.94           |
| L-Histidine     | 1.8 | 0.52        | 4.5E-02 | 0.73           |
| L-Arginine      | 14  | 0.44        | 8.6E-02 | 0.64           |
| L-Tryptophan    | 2.1 | 0.58        | 9.4E-02 | 1.01           |
| L-Alanine       | 2.4 | 0.45        | 2.7E-04 | 0.63           |
| L-Valine        | 1.3 | 0.29        | 2.3E-03 | 0.51           |
| L-Lysine        | 2.5 | 0.22        | 6.1E-03 | 0.80           |
| L-Glutamine     | 1.6 | 0.44        | 9.5E-02 | 0.72           |

**Table S5.** Different metabolites between Tgy-N and MC groups in the pathway of ABC transporters.

| Metabolites            | VIP  | Tgy-N vs MC |         | Tgy-N vs Tgy-C |
|------------------------|------|-------------|---------|----------------|
|                        |      | Fold Change | P-value | Fold Change    |
| L-Threonine            | 1.2  | 0.50        | 3.5E-04 | 0.92           |
| Thiamine               | 16.5 | 0.50        | 1.6E-03 | 0.87           |
| L-Phenylalanine        | 6.7  | 0.49        | 2.4E-03 | 0.89           |
| L-Leucine              | 4.3  | 0.59        | 3.2E-03 | 0.95           |
| Riboflavin             | 1.2  | 0.50        | 1.2E-02 | 1.04           |
| L-Glutamate            | 2.1  | 0.55        | 3.1E-02 | 0.95           |
| Deoxycytidine          | 1.7  | 1.60        | 3.7E-02 | 0.99           |
| L-Histidine            | 1.8  | 0.52        | 4.5E-02 | 0.73           |
| N-Acetyl-D-glucosamine | 1.4  | 2.09        | 8.5E-02 | 1.13           |
| L-Arginine             | 14   | 0.44        | 8.6E-02 | 0.64           |
| L-Alanine              | 2.4  | 0.45        | 2.7E-04 | 0.63           |
| L-Valine               | 1.3  | 0.29        | 2.3E-03 | 0.51           |
| 2'-Deoxyuridine        | 6.4  | 0.24        | 2.7E-03 | 0.63           |
| L-Lysine               | 2.5  | 0.22        | 6.1E-03 | 0.80           |
| Deoxyinosine           | 5.6  | 0.39        | 2.8E-02 | 0.95           |
| D-Mannose              | 6.4  | 0.56        | 5.1E-02 | 0.71           |
| Taurine                | 7.4  | 0.36        | 6.8E-02 | 1.37           |
| L-Glutamine            | 1.6  | 0.44        | 9.5E-02 | 0.72           |

**Table S6.** Different metabolites between Tgy-Q and MC groups in the pathway of biosynthesis of amino acids.

| Metabolites     | VIP | Tgy-Q vs MC |         | Tgy-Q vs Tgy-C |
|-----------------|-----|-------------|---------|----------------|
|                 |     | Fold Change | P-value | Fold Change    |
| L-Arginine      | 5.5 | 0.39        | 3.1E-02 | 1.05           |
| L-Histidine     | 1.8 | 0.50        | 4.8E-02 | 0.93           |
| L-Tryptophan    | 1.7 | 0.62        | 9.0E-02 | 1.08           |
| L-Valine        | 1.4 | 0.30        | 1.3E-03 | 0.53           |
| L-Lysine        | 2.4 | 0.36        | 2.1E-02 | 1.12           |
| 3-Phosphoserine | 1.3 | 6.40        | 2.5E-02 | 1.43           |
| L-Citrulline    | 1.7 | 0.52        | 5.8E-02 | 1.13           |
| L-Threonine     | 1.4 | 0.62        | 5.9E-02 | 1.34           |
| L-Glutamine     | 1.6 | 0.44        | 6.9E-02 | 0.71           |

**Table S7.** Different metabolites between Tgy-Q and MC groups in the pathway of ABC transporters.

| Metabolites            | VIP | Tgy-Q vs MC |         | Tgy-Q vs Tgy-C |
|------------------------|-----|-------------|---------|----------------|
|                        |     | Fold Change | P-value | Fold Change    |
| N-Acetyl-D-glucosamine | 1.7 | 2.28        | 4.7E-03 | 1.51           |
| Thiamine               | 13  | 0.62        | 1.8E-02 | 1.09           |
| L-Arginine             | 5.5 | 0.39        | 3.1E-02 | 1.05           |
| L-Histidine            | 1.8 | 0.50        | 4.8E-02 | 0.93           |
| Taurine                | 1.1 | 0.31        | 7.2E-02 | 1.05           |
| L-Valine               | 1.4 | 0.30        | 1.3E-03 | 0.53           |
| L-Lysine               | 2.4 | 0.36        | 2.1E-02 | 1.12           |
| L-Threonine            | 1.4 | 0.62        | 5.9E-02 | 1.34           |
| D-galacturonic acid    | 1.3 | 1.96        | 6.9E-02 | 2.00           |
| L-Glutamine            | 1.6 | 0.44        | 6.9E-02 | 0.71           |

**Figure S1.** Tgy-C treatment showed different effect on the metabolome with Tgy-N and Tgy-Q in AD mice. Score scatter plot of OPLS-DA for Tgy-C vs Tgy-N and Tgy-C vs Tgy-Q in positive (A and C) and negative (B and D) ion mode.

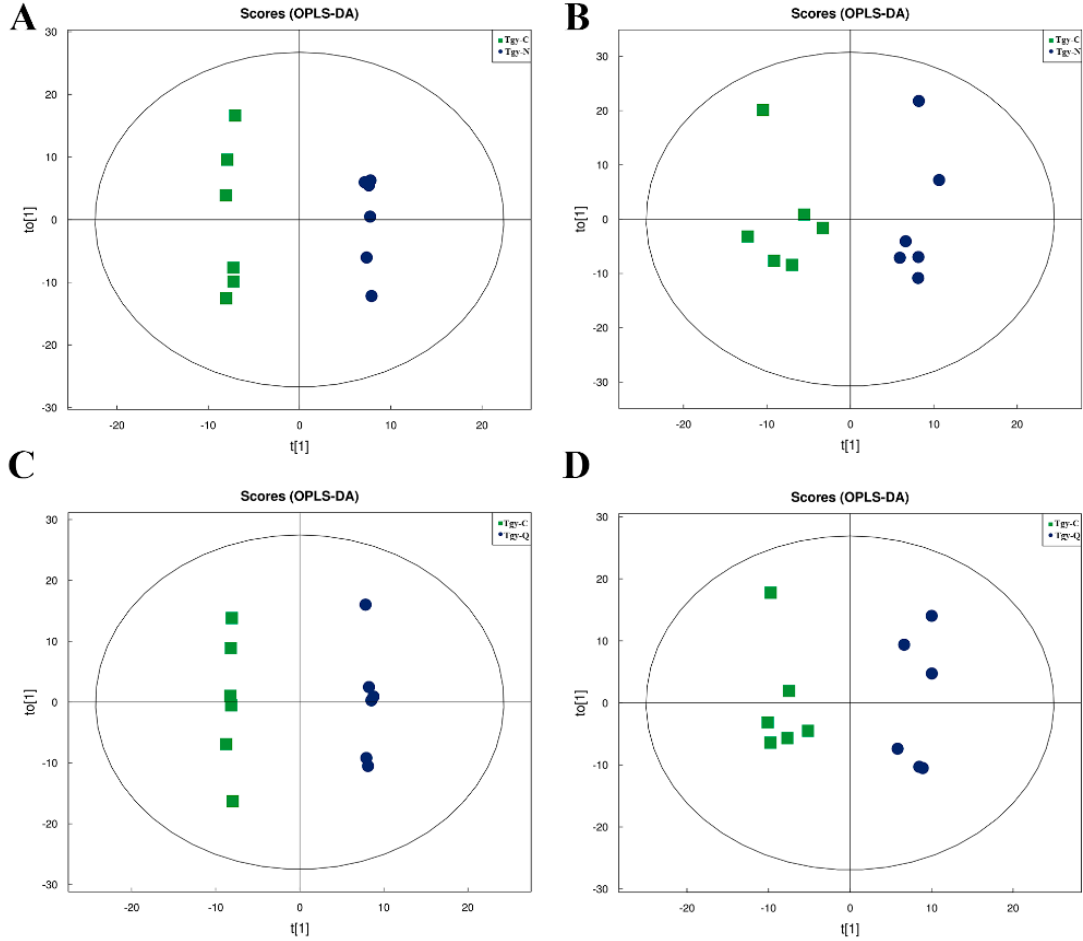

Supplement: s1 [file s1]
